in hernia repair surgery within Europe. Agreement (consensus) with the statements was defined as high if  $\geq 70\%$  and very high if  $\geq 90\%$  of respondents agreed with a statement. After the initial survey round, some statements were revised and these were then reissued, 34 statements were included in the final analysis”

**Results:** “A total of 255 responses were received over the two rounds of survey. Respondents ( $n = 255$ ) were all surgeons involved in hernia repair in Europe. Fourteen statements (41%) achieved very high consensus ( $\geq 90\%$ ), 24 statements achieved consensus ( $\geq 70\%$  to  $< 90\%$ ) while one statement (3%) fell short of consensus with an agreement score of 69%.”

**Conclusions:** “Expert consensus opinion about the use of LTBA for hernia (Grades 2-3) as the standard of care was achieved. Based on the consensus scores, the steering group derived eleven key recommendations which, if implemented, should result in a clearer understanding of how and when a LTBA might be used in hernia repair, aiming for improvement in surgical and patient related outcomes”

## P020 ESTABLISHING PEER-CONSENSUS ABOUT THE USE OF LONG-TERM BIOSYNTHETIC ABSORBABLE MESH FOR VENTRAL HERNIA (GRADE 2-3) AS THE STANDARD OF CARE

Salvador Morales-Conde<sup>1</sup>, Frederik Berrevoet<sup>2</sup>, Lars Nannestad Jorgensen<sup>3</sup>, Domenico Marchi<sup>4</sup>, Pablo Ortega-Deballon<sup>5</sup>, Al Windsor<sup>6</sup>

<sup>1</sup>University Hospital Virgen del Rocío, Surgery, Sevilla, Spain, <sup>2</sup>Ghent University Hospital, Department of General and Hpb Surgery and Liver Transplantation. University Hospital Ghent, Ghent, Belgium, <sup>3</sup>Bispebjerg Hospital, Digestive Disease Center, ..., Copenhagen NV, Denmark, <sup>4</sup>Colorectal Surgery Unit, Department of Surgery, Campus Bio-Medico University of Rome, Rome, Italy, <sup>5</sup>Department of General & Digestive Surgery. University Hospital of Dijon, Dijon, France, <sup>6</sup>Consultant Surgeon, Hca Healthcare UK, London Digestive Centre, London, United Kingdom

**Aim:** “This consensus project was initiated to provide insight into those situations where a long-term biosynthetic absorbable mesh (LTBA) might be considered the standard of care in repair of ventral hernia grades 2 and 3 (original Ventral Hernia Working Group Classification, 2010).”

**Material and Methods:** “A steering group of surgical experts developed 35 initial statements formed from six domains. These statements were used to develop an online survey which was sent to surgeons involved
